# Supplementary material
Source: PubMed Central journal article supplement (PMC10015130)
Supplement: 10888_2022_9560_MOESM1_ESM.pdf [file 10888_2022_9560_MOESM1_ESM.pdf]

## A Appendix

Table A1: The distribution of monthly pre-tax earnings in Sweden 2020

| Threshold | Monthly income level | Fractile    | Number of taxpayers | Average monthly income |
|-----------|----------------------|-------------|---------------------|------------------------|
|           |                      | P0-100      | 5,396,585           | 28.2                   |
|           |                      | P0-25       | 1,349,142           | 4.8                    |
| P25       | 13.8                 | P25-50      | 1,349,147           | 21.9                   |
| P50       | 27.8                 | P50-75      | 1,349,141           | 32.4                   |
| P75       | 37.6                 | P75-90      | 809,495             | 42.5                   |
| P90       | 49.3                 | P90-99      | 485,694             | 61.6                   |
| P99       | 95.9                 | P99-99.9    | 48,569              | 126.0                  |
| P99.9     | 220.0                | P99.9-99.99 | 4,857               | 311.1                  |
| P99.99    | 592.0                | P99.99-100  | 540                 | 1,022.3                |

*Notes:* Earnings are expressed in 1000s SEK. *Source:* The monthly payroll tax register at the Swedish Tax Agency.

Table A2: The distribution of annual pre-tax market income in Sweden 2020

| Threshold | Yearly market income | Fractile    | Number of taxpayers | Average yearly market income |
|-----------|----------------------|-------------|---------------------|------------------------------|
|           |                      | P0-100      | 8,280,140           | 316.6                        |
|           |                      | P0-25       | 2,070,033           | 30.1                         |
| P25       | 137.9                | P25-50      | 2,070,037           | 207.8                        |
| P50       | 276.1                | P50-75      | 2,070,031           | 343.5                        |
| P75       | 415.2                | P75-90      | 1,242,023           | 481.9                        |
| P90       | 576.4                | P90-99      | 745,214             | 774.9                        |
| P99       | 1,410.1              | P99-99.9    | 74,521              | 2,103.5                      |
| P99.9     | 4,369.4              | P99.9-99.99 | 7,452               | 6,959.5                      |
| P99.99    | 16,233.2             | P99.99-100  | 829                 | 40,427.5                     |

*Notes:* Market income is expressed in 1000s SEK and consists of labor income, income from own businesses, and capital income before taxes. *Source:* The annual personal tax return register at the Swedish Tax Agency.

Table A3: Short-term Work Allowance (STWA): Distribution of the costs borne for the work-time reduction

| Level | Reduction in work time | Costs borne:             |                         |                   |
|-------|------------------------|--------------------------|-------------------------|-------------------|
|       |                        | Workers (reduced salary) | Firms (extra wage cost) | Government (STWA) |
| 1     | 20%                    | 4%                       | 1%                      | 15%               |
| 2     | 40%                    | 6%                       | 4%                      | 30%               |
| 3     | 60%                    | 7.5%                     | 7.5%                    | 45%               |
| 4     | 80%                    | 12%                      | 8%                      | 60%               |

*Note:* The table shows the statutory rules in 2020 for work-time reduction and costs for this borne by employees, employers and the government within the STWA support policy. The 80% work-time reductions (Level 4) were only available in May-July 2020.

Figure A1: Pre- and post-tax Gini-coefficient

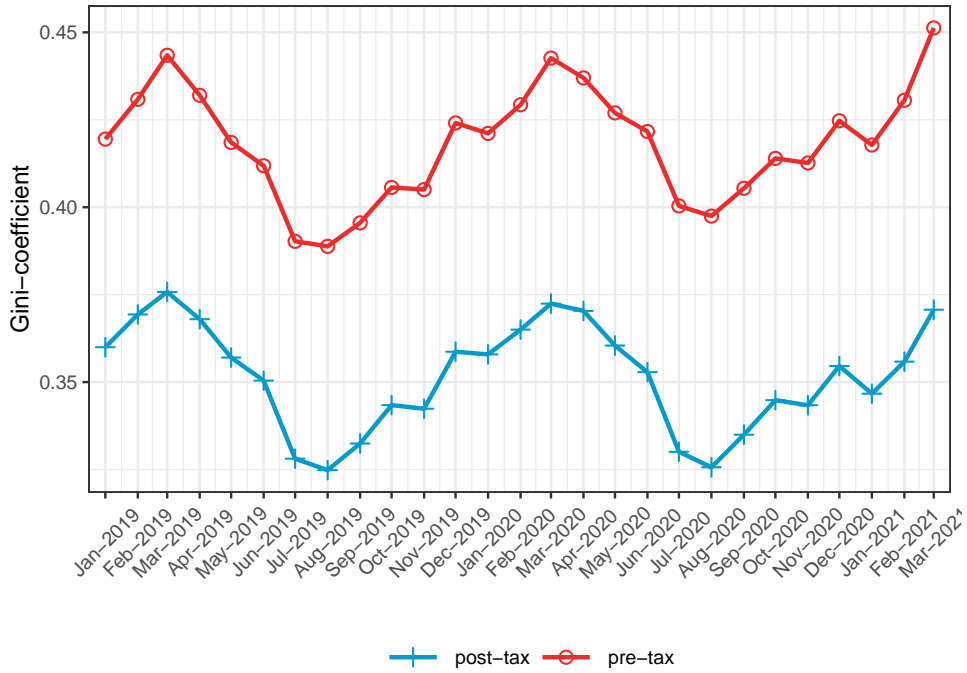

*Note:* Post-tax earnings is calculated as the difference between pre-tax labor earnings and the amount of withheld tax. This amount can in some cases be negative since withheld tax is paid also for other income sources than labor earnings. Negative calculated values of post-tax income (approximately 5 % of the observations) have been removed in the calculation of the Gini-coefficient.

Table A4: Effect estimates of COVID-19 effects on monthly wages: Various specifications

|                                 | <i>Dependent variable:</i> |                      |                      |                      |                       |                       |                       |                      |
|---------------------------------|----------------------------|----------------------|----------------------|----------------------|-----------------------|-----------------------|-----------------------|----------------------|
|                                 | log(w)                     | log(w)               | log(w)               | log(w)               | 1[w>0]                | 1[w>0]                | 1[w>0]                | 1[w>0]               |
|                                 | (1)                        | (2)                  | (3)                  | (4)                  | (5)                   | (6)                   | (7)                   | (8)                  |
| <i>Covid impact</i>             | -0.038***<br>(0.0005)      | -0.033***<br>(0.001) | -0.026***<br>(0.001) | -0.025***<br>(0.001) | -0.014***<br>(0.0003) | -0.013***<br>(0.0005) | -0.024***<br>(0.0004) | -0.020***<br>(0.001) |
| <i>Impact × Woman</i>           |                            | -0.010***<br>(0.001) |                      | -0.008***<br>(0.001) |                       | -0.001<br>(0.001)     |                       | -0.012***<br>(0.001) |
| <i>Impact × Public</i>          |                            |                      | -0.016***<br>(0.001) | -0.012***<br>(0.002) |                       |                       | 0.028***<br>(0.001)   | 0.029***<br>(0.001)  |
| <i>Impact × Woman × Public</i>  |                            |                      |                      | -0.003<br>(0.002)    |                       |                       |                       | 0.004*<br>(0.002)    |
| <i>Year 2020</i>                | 0.062***<br>(0.0005)       | 0.053***<br>(0.001)  | 0.064***<br>(0.001)  | 0.055***<br>(0.001)  | 0.002***<br>(0.0004)  | 0.003***<br>(0.0005)  | 0.005***<br>(0.0004)  | 0.005***<br>(0.001)  |
| <i>Mar-Dec</i>                  | 0.049***<br>(0.0003)       | 0.047***<br>(0.0004) | 0.053***<br>(0.0004) | 0.051***<br>(0.0005) | 0.023***<br>(0.0002)  | 0.025***<br>(0.0003)  | 0.026***<br>(0.0003)  | 0.027***<br>(0.0004) |
| <i>Woman</i>                    |                            | -0.188***<br>(0.001) |                      | -0.192***<br>(0.002) |                       | 0.007***<br>(0.001)   |                       | -0.004***<br>(0.001) |
| <i>Public employer</i>          |                            |                      | -0.122***<br>(0.001) | -0.106***<br>(0.002) |                       |                       | -0.003***<br>(0.001)  | -0.024***<br>(0.001) |
| <i>Woman × Public</i>           |                            |                      |                      | 0.063***<br>(0.003)  |                       |                       |                       | 0.034***<br>(0.001)  |
| <i>2020 × Woman</i>             |                            | 0.019***<br>(0.001)  |                      | 0.024***<br>(0.001)  |                       | -0.001<br>(0.001)     |                       | 0.001<br>(0.001)     |
| <i>2020 × Public</i>            |                            |                      | -0.006***<br>(0.001) | -0.012***<br>(0.002) |                       |                       | -0.008***<br>(0.001)  | -0.009***<br>(0.001) |
| <i>2020 × Woman × Public</i>    |                            |                      |                      | -0.004<br>(0.002)    |                       |                       |                       | 0.002<br>(0.002)     |
| <i>Mar-Dec × Woman</i>          |                            | 0.005***<br>(0.001)  |                      | 0.006***<br>(0.001)  |                       | -0.004***<br>(0.0005) |                       | -0.002*<br>(0.001)   |
| <i>Mar-Dec × Public</i>         |                            |                      | -0.013***<br>(0.001) | -0.021***<br>(0.001) |                       |                       | -0.010***<br>(0.0005) | -0.010***<br>(0.001) |
| <i>Mar-Dec × Woman × Public</i> |                            |                      |                      | 0.010***<br>(0.002)  |                       |                       |                       | 0.0004<br>(0.001)    |
| <i>Intercept</i>                | 3.446***<br>(0.001)        | 3.534***<br>(0.001)  | 3.495***<br>(0.001)  | 3.563***<br>(0.001)  | 0.820***<br>(0.0004)  | 0.816***<br>(0.0005)  | 0.821***<br>(0.0004)  | 0.822***<br>(0.001)  |
| Observations                    | 14,486,400                 | 14,486,400           | 14,486,400           | 14,486,400           | 25,913,805            | 25,913,805            | 25,913,805            | 25,913,805           |
| Adjusted R <sup>2</sup>         | 0.002                      | 0.032                | 0.021                | 0.041                | 0.0004                | 0.0005                | 0.001                 | 0.001                |

Note: \*p<0.05; \*\*p<0.01; \*\*\*p<0.001.

Figure A2: Lorenz-curves based on monthly pre-tax income

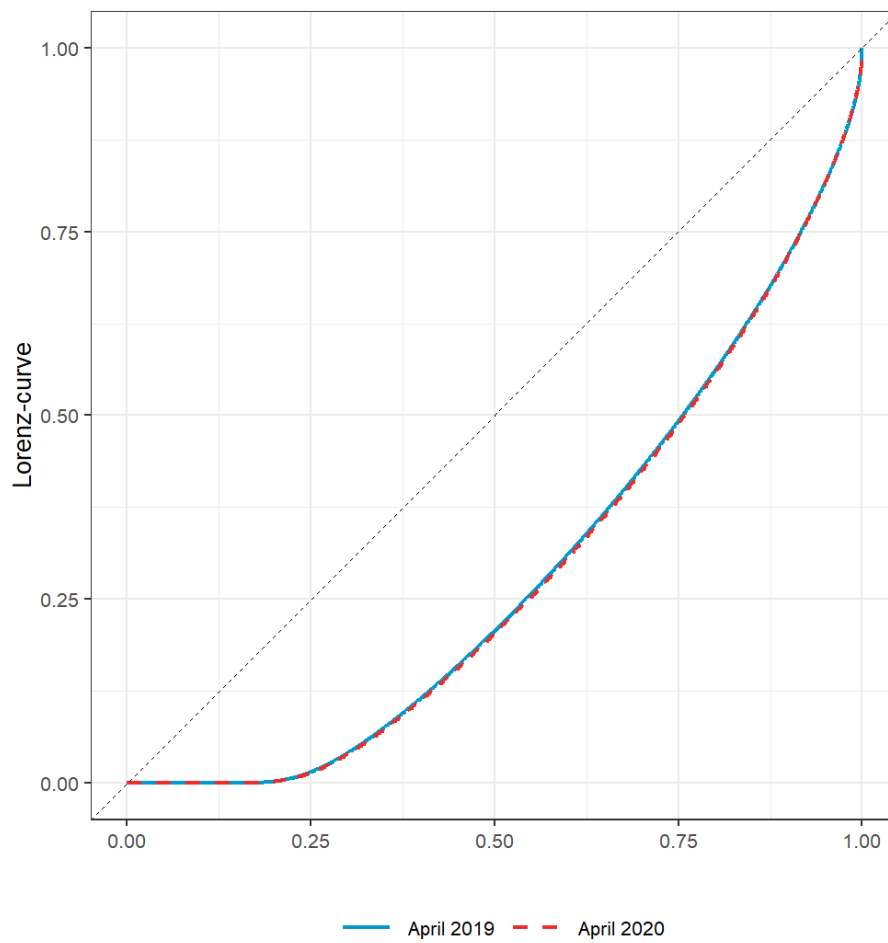

*Note:* The figure shows Lorenz-curves for monthly pre-tax earnings during April in the working population aged 18-64. See section 3 for data details.

Figure A3: Lorenz-curves based on yearly post-tax income

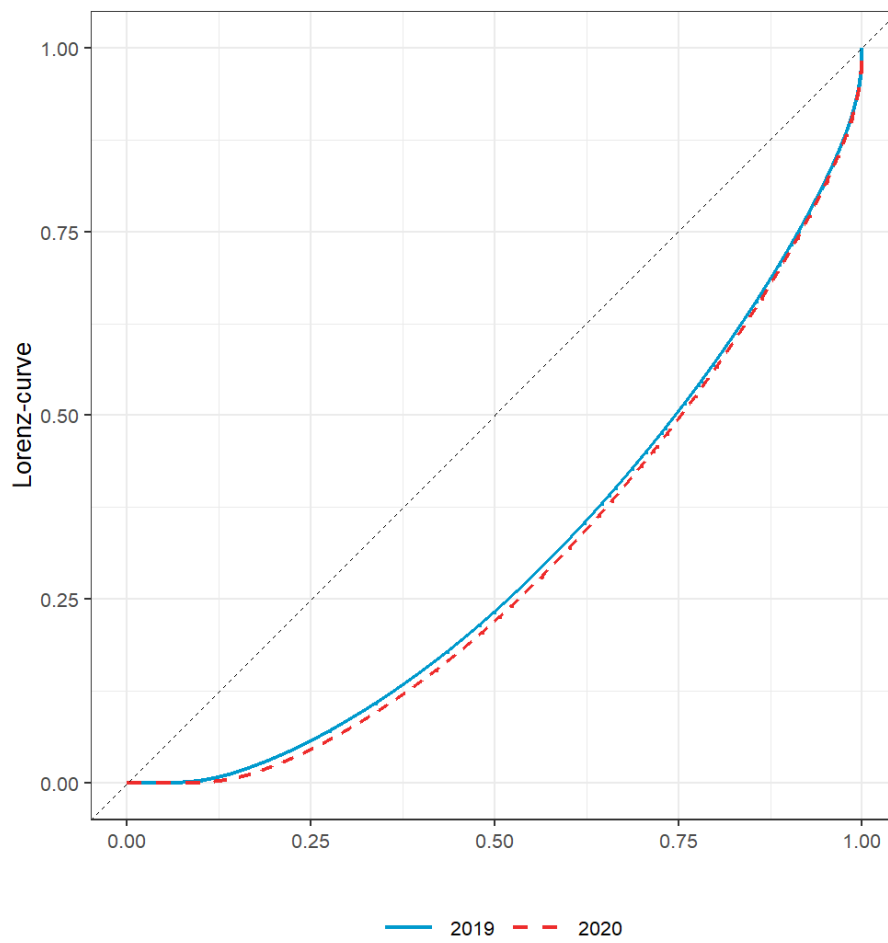

*Note:* The figure shows Lorenz-curves for yearly post-tax market income. See section 6 for data details.
